# Supplementary material for: BiOBr/Ti3C2 nanocomposites prepared via an octanol solvothermal method to achieve enhanced visible photocatalytic properties
Source: Royal Society of Chemistry journal article supplement (doi:10.1039/d0ce01688h), 2021-01-01
Supplement: d0ce01688h1.pdf [file d0ce01688h1.pdf]

## Supplementary Information

### **BiOBr/Ti<sub>3</sub>C<sub>2</sub> nanocomposites prepared via octanol solvothermal method to achieve enhanced visible photocatalytic properties**

JinFeng Song <sup>a</sup>, XiaoRong Meng <sup>a,\*</sup>, Jing Ren <sup>b</sup> and JunFeng Zhu <sup>a</sup>

<sup>a</sup>:Xi'an University of Architecture & Technology, Sch Chem & Chem Engr, Xian 710055, Peoples R China.

<sup>b</sup>: Xi'an University of Architecture & Technology, Sch Environm & Municipal Engr, Xian 710055, Peoples R China.

**E-mail:** mxr5@163.com

**Phone:** +86-13363949657

**Address:** Xian Univ Architecture & Technol, Xian 710055, Peoples R China.

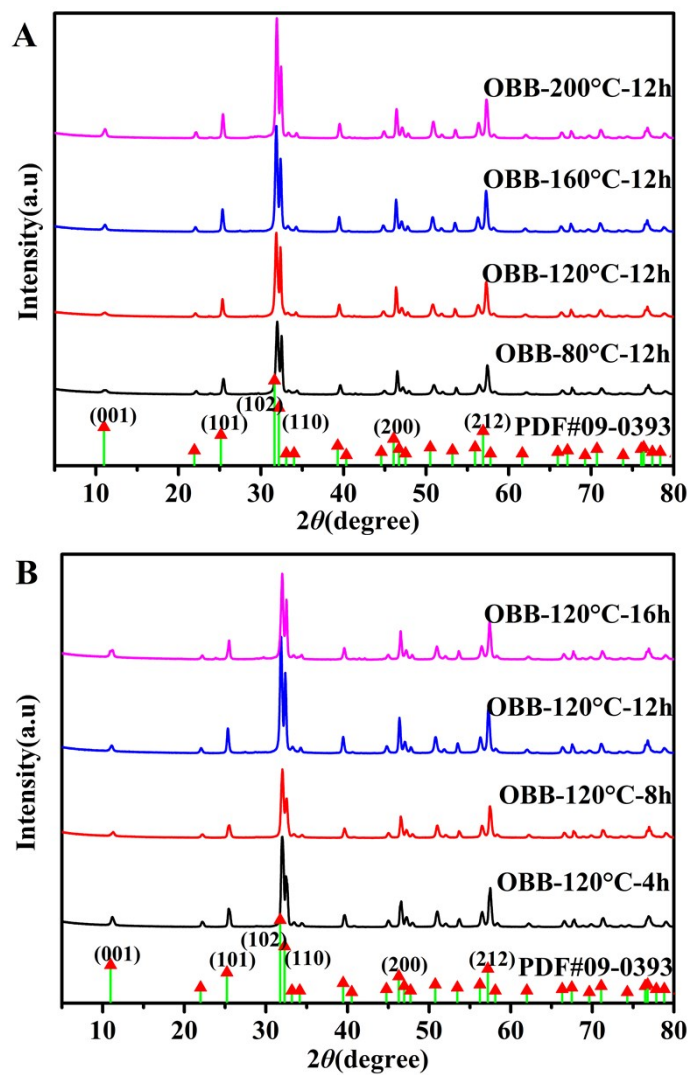

Figure S1 XRD spectra of OBB at different temperature (A) and time (B).

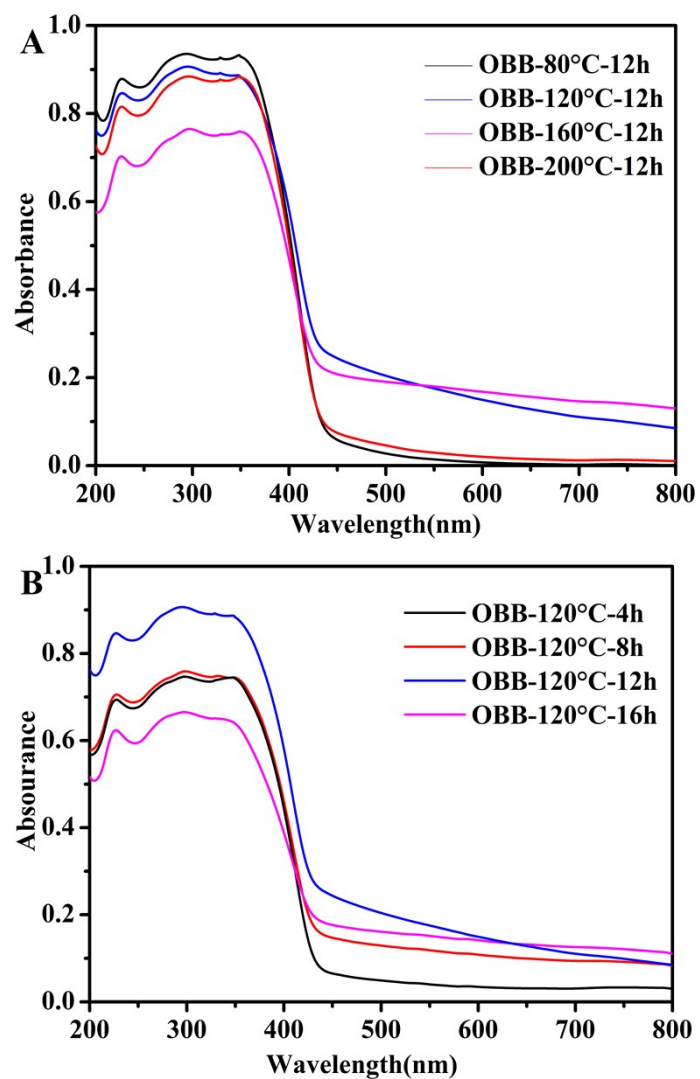

Figure S2 UV-vis diffuse reflectance spectra of OBB at different temperature (A) and time (B).

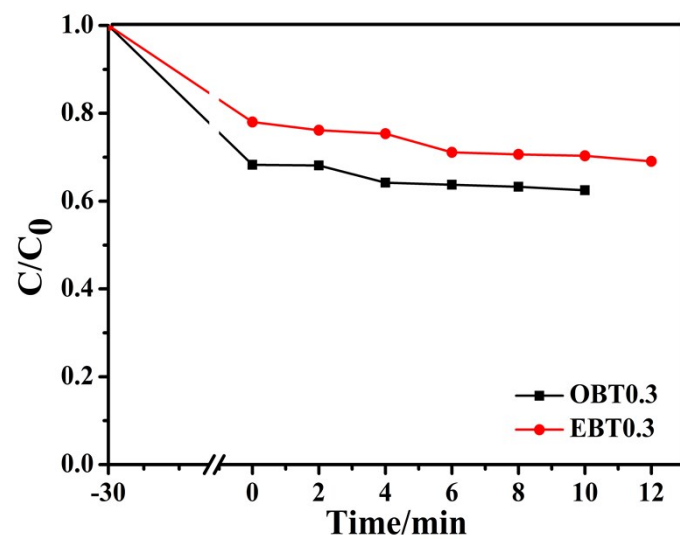

**Figure S3** Dark adsorption curve of OBT0.3 and EBT0.3.

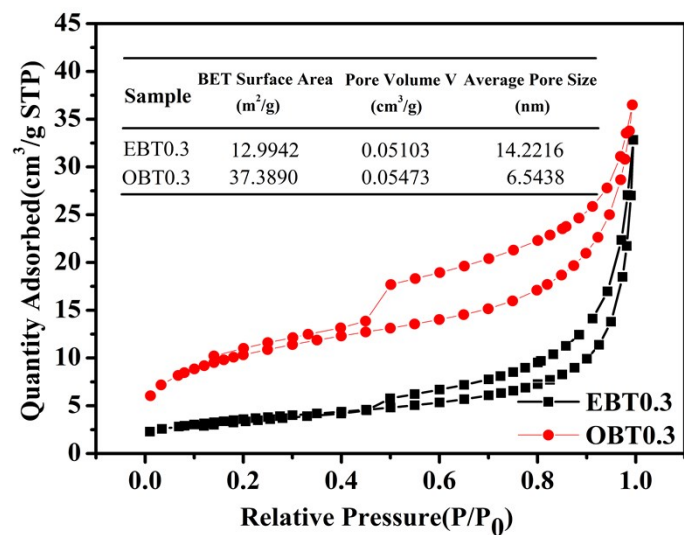

Figure S4 Nitrogen adsorption and desorption isotherms of OBT0.3 and EBT0.3.

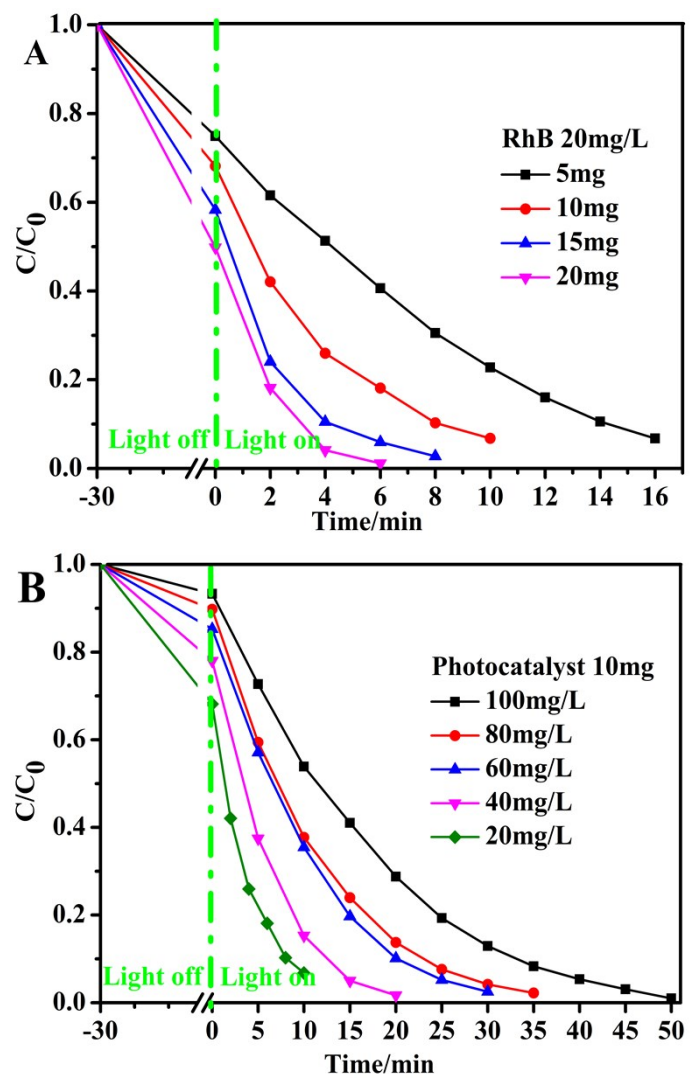

Figure S5 The Photocatalytic degradation curve of RhB with different amount of OBT0.3 (A) and different dye concentration (B).

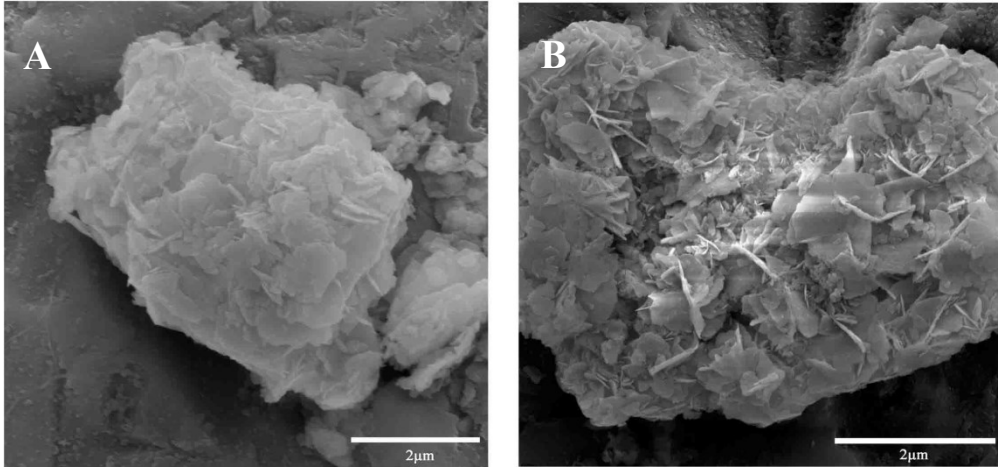

**Figure S6 SEM images of (A) OBT0.3(120°C, 4h) and (B) OBT0.3(120°C, 8h).**

**Table S1 Comparison of properties between octanol and ethylene glycol \***

|                 | Dielectric constant/ $\epsilon$ | Viscosity/mPa.S                                   |
|-----------------|---------------------------------|---------------------------------------------------|
| Ethylene glycol | 41.4                            | 16.1(25°C)6.554(50°C)<br>3.340(75°C)1.975(100°C)  |
| Octanol         | 10.3                            | 7.288(25°C)3.232(50°C)<br>1.681(75°C)0.991(100°C) |

\*Data from: The 84th Edition of the CRC Handbook of Chemistry and Physics.

**Table S2 Comparison of degradation of rhodamine B by BiOBr/Ti<sub>3</sub>C<sub>2</sub> composites prepared in other literature**

| Photo-catalyst                                         | method                                | mass (mg) | Dye (concentration) | Volume | Light source   | Dark reaction and photodegradation reaction time | Degradation efficiency | Reference |
|--------------------------------------------------------|---------------------------------------|-----------|---------------------|--------|----------------|--------------------------------------------------|------------------------|-----------|
| BiOBr/Ti <sub>3</sub> C <sub>2</sub>                   | Ethylene glycol as solvent, 80 °C, 2h | 50mg      | RhB(20mg/L)         | 100mL  | Xe Lamp (300W) | 30min+ <b>50min</b>                              | ~99%                   | [1]       |
| BiOBr/Ti <sub>3</sub> C <sub>2</sub>                   | Hydrolysis preparation                | 10mg      | RhB(20mg/L)         | 50mL   | Xe Lamp (300W) | 30min+ <b>24min</b>                              | ~97%                   | [2]       |
| BiOBr/Ti <sub>3</sub> C <sub>2</sub>                   | Water as solvent, 160 °C, 18h         | 100mg     | RhB(10mg/L)         | 100mL  | Xe Lamp (300W) | 15min+ <b>60min</b>                              | ~99%                   | [3]       |
| BiOBr/TiO <sub>2</sub> /Ti <sub>3</sub> C <sub>2</sub> | Water as solvent, 120 °C, 24h         | 20mg      | RhB(100mg/L)        | 50mL   | Xe Lamp (300W) | 30min+ <b>30min</b>                              | 99.8%                  | [4]       |
| BiOBr/Ti <sub>3</sub> C <sub>2</sub> (OBT0.3)          | Octanol as solvent, 120 °C, 12h       | 10mg      | RhB(20mg/L)         | 50mL   | Xe Lamp (300W) | 30min+ <b>10min</b>                              | 99.3%                  | This Work |

### Notes and references

- [1] Liu C , Xu Q , Zhang Q , et al. Layered BiOBr/Ti<sub>3</sub>C<sub>2</sub> MXene composite with improved visible-light photocatalytic activity. *Journal of Materials Science*, 2018, 54(3):2458-2471.
- [2] Huang Q S, Liu Y , Cai T , et al. Simultaneous removal of heavy metal ions and organic pollutant by BiOBr/Ti<sub>3</sub>C<sub>2</sub> nanocomposite. *Journal of Photochemistry and Photobiology A: Chemistry*, 2019, 375:201-208.
- [3] Li Z Z , Zhang H G , Wang L , et al. 2D/2D BiOBr/Ti<sub>3</sub>C<sub>2</sub> heterojunction with dual applications in both water detoxification and water splitting. *Journal of Photochemistry and Photobiology A: Chemistry*, 2020, 386:112099.
- [4] Xu, T X , Wang, J P , Cong, Y , et al. Ternary BiOBr/TiO<sub>2</sub>/Ti<sub>3</sub>C<sub>2</sub>T<sub>x</sub> MXene nanocomposites with heterojunction structure and improved photocatalysis performance. *Chinese Chemical Letters*, 2020, 31(4):1022-1025.
